# Supplementary material for: Variant Spectrum of Formin Homology 2 Domain‐Containing 3 Gene in Chinese Patients With Hypertrophic Cardiomyopathy
Source: PubMed Central journal article supplement — J Am Heart Assoc. 2021 Feb 15;10(5):e018236. doi: 10.1161/JAHA.120.018236 (PMC8174292; doi:10.1161/jaha.120.018236), 2021-02-15
Supplement: JAH3-10-e018236-s001.pdf [file JAH3-10-e018236-s001.pdf]

# **Supplemental Material**

**Table S1. Customized classification of pathogenic variants based on the recommendations of the ACMG guideline.**

| Classification    | Major criteria                                                                                                                                                                                                                                                                                                                                                                                                                                                            | Supporting criteria                                                                                                                                                                                                                                                                                                                                                                                                                                                                                                                                                                                                                                                                     |
|-------------------|---------------------------------------------------------------------------------------------------------------------------------------------------------------------------------------------------------------------------------------------------------------------------------------------------------------------------------------------------------------------------------------------------------------------------------------------------------------------------|-----------------------------------------------------------------------------------------------------------------------------------------------------------------------------------------------------------------------------------------------------------------------------------------------------------------------------------------------------------------------------------------------------------------------------------------------------------------------------------------------------------------------------------------------------------------------------------------------------------------------------------------------------------------------------------------|
| Pathogenic        | <p>1. Widely reported variant with conclusive evidence of genotype-phenotype association and with consensus about its pathogenicity.</p> <p>2. Demonstrated co-segregation with a phenotype (&gt; 10 meioses)</p> <p>3. Co-segregation in at least 2 families (<math>\leq 10</math> meioses), or present in at least 5 probands with the same phenotype and meeting at least 2 supporting criteria.</p>                                                                   | <p>A. Protein-truncating variant in a gene where loss of function is a proven pathogenic mechanism</p> <p>B. Functional studies that supporting pathogenicity.</p> <p>C. De novo presentation in the setting of a novel disease in the family (maternity and paternity confirmed)</p> <p>D. Missense variant that generates the same amino-acid change as a previously reported pathogenic variant.</p> <p>E. Variant with very low frequency/absent in the control population (MAF &lt; 0.001%).</p>                                                                                                                                                                                   |
| Likely pathogenic | <p>1. Protein-truncating variant with very low frequency/absent in the control population (MAF &lt; 0.001%) that affects a gene where loss of function is not an established pathogenic mechanism or that does not meet criteria to be considered pathogenic.</p> <p>2. Missense variant/in-frame insertion or deletion in a non-repetitive region of a gene which does not meet criteria to be considered pathogenic, but that meets at least 3 supporting criteria.</p> | <p>A. Variant with very low allelic frequency/absent in the control population (MAF &lt; 0.001%).</p> <p>B. De novo presentation in the setting of a novel disease in the family (maternity and paternity unconfirmed).</p> <p>C. Patient's phenotype or family history suggests that disease could be explained by mutations in the gene (gene with well-established phenotype-genotype association).</p> <p>D. Bioinformatics predictors agree that it would be deleterious.</p> <p>E. Located in a mutational hot-spot, functional domain, or relevant region of the codified protein.</p> <p>F. Reported in at least 2 unrelated individuals that presented the same phenotype.</p> |

|                                           |                                                                                                                                                                                                                                                                                                                                                                                               |                                                                                                                                                                                                                                                                                                                                                                                                                                                                                                                                                                                                  |
|-------------------------------------------|-----------------------------------------------------------------------------------------------------------------------------------------------------------------------------------------------------------------------------------------------------------------------------------------------------------------------------------------------------------------------------------------------|--------------------------------------------------------------------------------------------------------------------------------------------------------------------------------------------------------------------------------------------------------------------------------------------------------------------------------------------------------------------------------------------------------------------------------------------------------------------------------------------------------------------------------------------------------------------------------------------------|
| <p>Variants of uncertain significance</p> | <p>1.Variants with contradictory information about their pathogenicity</p> <p>2.Variant that do not meet criteria for being included in another classification category</p>                                                                                                                                                                                                                   |                                                                                                                                                                                                                                                                                                                                                                                                                                                                                                                                                                                                  |
| <p>Likely benign</p>                      | <p>1.Variant allele frequency in control populations is higher than the expected for diseases or has a <math>MAF &gt; 0.01\%</math>.</p> <p>2.Absence of variant co-segregation with the phenotype in at least one family.</p> <p>3.Meeting at least 2 supporting criteria.</p>                                                                                                               | <p>A. Missense variant in a gene where only variants causing protein truncation have shown association with disease.</p> <p>B. Functional study showing that the variant does not affect the structure or function of the encoded protein.</p> <p>C. Bioinformatics predictors agree that the variant would not alter the function of the protein (including splicing variants outside the consensus region of the gene).</p> <p>D. In-frame insertion/deletions in a repetitive gene region without known function.</p> <p>E. Presence of the variant in homozygosis in control population.</p> |
| <p>Benign</p>                             | <p>1.<math>MAF &gt; 1\%</math> in any of the control population databases.</p> <p>2.Previously reported in the literature with well-established evidence of consensus about its non-disease-causing classification, and with no contradictory data.</p> <p>3.Absence of co-segregation with the disease in at least 2 reported families.</p> <p>4.Meeting at least 2 supporting criteria.</p> | <p>A. Variant allele frequency in controls population is higher than expected for disease or has a <math>MAF &gt; 0.01\%</math></p> <p>B. Absence of co-segregation of the variant with the phenotype in at least 1 family.</p> <p>C. Functional study showing that the variant does not affect the structure of function of the encoded protein.</p> <p>D. Presence of the variant in healthy unaffected subjects at an age at which the disease should be full penetrant (variant must be in homozygosis in recessively inherited disease, or in hemizygososis in X-linked diseases).</p>      |

---

ACMG<sup>19</sup>, American College of Medical Genetics and Genomics; MAF, minor allele frequency.

**Table S2. The variants of *FHOD3* detected in HCM patients and controls.**

| Transcript effect | Protein          | Type     | Variant                     | dsSNP       | <i>FHOD3</i> | CADD  | SIFT  | Polyphen | GnomAD <sup>g</sup> | ExAC <sup>h</sup> | In-house | Phenotype (n)            |
|-------------------|------------------|----------|-----------------------------|-------------|--------------|-------|-------|----------|---------------------|-------------------|----------|--------------------------|
| (NM_001281740.1)  | (NP_001268669.1) |          | classification <sup>†</sup> |             | domain       |       |       |          | MAF%                | MAF%              | MAF%     |                          |
| c.274C>T          | p.Arg92Trp       | Missense | VUS                         | rs759696197 | GBD/FH3      | 27.1  | 0.005 | 0.967    | 0.0032              | 0.0051            | 0.0284   | HCM (1)                  |
| c.562C>T          | p.Arg188Cys      | Missense | VUS                         | rs143579901 | GBD/FH3      | 24.2  | 0.001 | 0.015    | 0.0032              | 0                 | 0.0284   | HCM (1)                  |
| c.566A>G          | p.Asn189Ser      | Missense | LB                          | rs747688287 | GBD/FH3      | 17.74 | 0.49  | 0.001    | 0.0008              | 0.0008            | 0.0852   | HCM (1); control (2)     |
| c.595A>G          | p.Ile199Val      | Missense | B                           | rs61735987  | GBD/FH3      | 17.31 | 0.31  | 0.002    | 1.6533              | 3.2533            | 7.2414   | HCM (136); control (112) |
| c.646G>A          | p.Val216Ile      | Missense | VUS                         | rs551483382 | GBD/FH3      | 26.6  | 0.004 | 0.758    | 0.0084              | 0.0084            | 0.0284   | HCM (1)                  |
| c.776C>T          | p.Thr259Met      | Missense | VUS                         | rs770013602 | GBD/FH3      | 26.2  | 0.008 | 0.414    | 0.0096              | 0.0165            | 0.0284   | HCM (1)                  |
| c.796A>G          | p.Met266Val      | Missense | VUS                         | Novel       | GBD/FH3      | 24.1  | 0.187 | 0.21     | 0                   | 0                 | 0.0284   | Control (1)              |
| c.958G>T          | p.Val320Leu      | Missense | LB                          | rs571359036 | GBD/FH3      | 22.1  | 0.247 | 0.047    | 0.0062              | 0.0092            | 0.1420   | HCM (1); control (4)     |
| c.1004C>G         | p.Pro335Arg      | Missense | B                           | rs117005081 | GBD/FH3      | 23.0  | 0.058 | 0.159    | 1.2641              | 2.9346            | 0.7098   | HCM (16); control (9)    |
| c.1007G>A         | p.Ser336Asn      | Missense | VUS                         | Novel       | GBD/FH3      | 13.15 | NA    | NA       | 0                   | 0                 | 0.0284   | HCM (1)                  |
| c.1063C>T         | p.Arg355Trp      | Missense | VUS                         | Novel       | GBD/FH3      | 25.9  | 0.001 | 0.471    | 0                   | 0                 | 0.0284   | HCM (1)                  |
| c.1097C>T         | p.Ser366Leu      | Missense | VUS                         | rs747730516 | GBD/FH3      | 27.4  | 0.001 | 0.982    | 0.0032              | 0.0041            | 0.0568   | HCM (2)                  |
| c.1157C>T         | p.Pro386Leu      | Missense | VUS                         | Novel       | GBD/FH3      | 24.7  | NA    | NA       | 0                   | 0                 | 0.0284   | Control (1)              |
| c.1189C>T         | p.Arg397Cys      | Missense | VUS                         | rs760874847 | GBD/FH3      | 20.7  | 0.091 | 0.001    | 0                   | 0                 | 0.0568   | HCM (2)                  |
| c.1286+2delT      | NA               | Splicing | P                           | Novel       | Ex           |       |       |          | 0                   | 0                 | 0.1136   | HCM (4)                  |
| c.1297G>A         | p.Ala433Thr      | Missense | B                           | rs62083981  | Ex           | 0.945 | NA    | NA       | 2.3784              | 3.4027            | 0.1136   | HCM (3); control (1)     |
| c.1309C>T         | p.Gln437Ter      | Nonsense | LP                          | Novel       | Ex           | 35    |       |          | 0                   | 0                 | 0.0284   | HCM (1)                  |
| c.1364C>T         | p.Ser455Leu      | Missense | B                           | rs2848901   | Ex           | 16.74 | NA    | NA       | 27.0205             | 38.1965           | 43.7923  | HCM (486); control (343) |
| c.1411G>A         | p.Gly471Arg      | Missense | B                           | rs72895597  | Ex           | 1.256 | NA    | NA       | 12.8884             | 10.1348           | 0.9938   | HCM (11); control (24)   |
| c.1552G>A         | p.Val518Met      | Missense | VUS                         | Novel       | Ex           | 25.7  | NA    | NA       | 0                   | 0                 | 0.0284   | HCM (1)                  |

|           |              |          |     |             |     |       |       |       |        |         |        |                          |
|-----------|--------------|----------|-----|-------------|-----|-------|-------|-------|--------|---------|--------|--------------------------|
| c.1580C>T | p.Ser527Phe  | Missense | VUS | Novel       | Ex  | 25.5  | NA    | NA    | 0      | 0       | 0.0284 | HCM (1)                  |
| c.1640A>C | p.Glu547Ala  | Missense | VUS | Novel       | Ex  | 23.7  | NA    | NA    | 0      | 0       | 0.0284 | HCM (1)                  |
| c.1703G>T | p.Arg568Leu  | Missense | VUS | Novel       | Ex  | 20.9  | NA    | NA    | 0      | 0       | 0.0284 | HCM (1)                  |
| c.1733T>A | p.Phe578Tyr  | Missense | VUS | Novel       |     | 19.2  | NA    | NA    | 0      | 0       | 0.0284 | Control (1)              |
| c.1754C>A | p.Ser585Tyr  | Missense | LB  | rs200702049 |     | 21.5  | 0.005 | 0.348 | 0.0046 | 0.0091  | 0.2271 | HCM (5); control (3)     |
| c.1844C>T | p.Pro615Leu  | Missense | LB  | rs199579476 |     | 2.072 | 1.0   | 0.0   | 0.0024 | 0.0016  | 0.0284 | Control (1)              |
| c.1912C>T | p.Arg638Trp  | Missense | LB  | rs141148037 | CC  | 26.4  | 0.0   | 0.995 | 0.0478 | 0.0561  | 0.1136 | HCM (4)                  |
| c.1924G>A | p.Glu642Lys  | Missense | VUS | Novel       | CC  | 26.2  | 0.005 | 0.979 | 0      | 0       | 0.0284 | HCM (1)                  |
| c.2077C>T | p.Arg693Trp  | Missense | VUS | rs533572045 | DID | 29.1  | 0.0   | 0.292 | 0.0064 | 0       | 0.0284 | Control (1)              |
| c.2078G>A | p.Arg693Gln  | Missense | VUS | rs148866621 | DID | 23.2  | 0.083 | 0.001 | 0.0096 | 0.0087  | 0.0284 | HCM (1)                  |
| c.2090G>A | p.Arg697Gln  | Missense | VUS | rs553341694 | DID | 23.2  | 0.006 | 0.811 | 0.0065 | 0.0095  | 0.0568 | HCM (2)                  |
| c.2129C>G | p.Ala710Gly  | Missense | B   | rs61735993  | DID | 22.2  | 0.057 | 0.197 | 13.873 | 13.5774 | 7.2961 | HCM (118); control (102) |
| c.2260G>A | p.Glu754Lys  | Missense | LB  | rs139884505 | DID | 15.4  | 0.462 | 0.002 | 0.1721 | 0.1285  | 0.0284 | HCM (1)                  |
| c.2321A>G | p.Gln774Arg  | Missense | B   | rs61735994  | DID | 6.648 | 0.423 | 0.0   | 2.2748 | 2.8685  | 0.0852 | Control (3)              |
| c.2429G>T | p.Gly810Val  | Missense | VUS | Novel       | DID | 22.7  | 0.02  | 0.022 | 0      | 0       | 0.0284 | HCM (1)                  |
| c.2464G>A | p.Val822Phe  | Missense | LB  | Novel       | DID | 12.27 | NA    | NA    | 0      | 0       | 0.0852 | Control (3)              |
| c.2584G>A | p.Asp862Asn  | Missense | VUS | rs544119818 | DID | 21.1  | 0.671 | 0.002 | 0.0032 | 0.0043  | 0.0568 | HCM (2)                  |
| c.2746T>G | p.Ser916Ala  | Missense | VUS | Novel       | DID | 20.8  | 0.091 | 0.711 | 0      | 0       | 0.0568 | HCM (1); control (1)     |
| c.2824G>C | p.Glu942Gln  | Missense | VUS | rs779000457 | DID | 27.1  | 0.016 | 0.986 | 0.0025 | 0.0035  | 0.0284 | HCM (1)                  |
| c.2837G>A | p.Ser946Asn  | Missense | VUS | Novel       | DID | 15.46 | 0.247 | 0.058 | 0      | 0       | 0.0284 | HCM (1)                  |
| c.2915C>T | p.Pro972Leu  | Missense | LB  | rs551904999 | DID | 11.00 | 0.332 | 0.002 | 0.0064 | 0       | 0.0568 | Control (2)              |
| c.2954C>A | p.Ala985Asp  | Missense | VUS | Novel       | DID | 25.9  | 0.003 | 0.996 | 0      | 0       | 0.0284 | Control (1)              |
| c.3005A>T | p.Glu1002Val | Missense | VUS | Novel       | DID | 26.9  | 0.003 | 0.408 | 0      | 0       | 0.0284 | HCM (1)                  |

|           |              |          |     |             |     |       |       |       |         |         |        |                          |
|-----------|--------------|----------|-----|-------------|-----|-------|-------|-------|---------|---------|--------|--------------------------|
| c.3187G>A | p.Ala1063Thr | Missense | LB  | rs560946106 | FH2 | 13    | 0.515 | 0.003 | 0.0064  | 0.0041  | 0.0568 | HCM (2)                  |
| c.3412T>C | p.Ser1138Pro | Missense | VUS | Novel       | FH2 | 23.1  | 0.071 | 0.101 | 0       | 0       | 0.0284 | HCM (1)                  |
| c.3478G>A | p.Ala1160Thr | Missense | VUS | rs746707013 | FH2 | 24.6  | 0.004 | 0.777 | 0.0032  | 0       | 0.0284 | Control (1)              |
| c.3587C>G | p.Thr1196Arg | Missense | VUS | Novel       | FH2 | 25.2  | 0.01  | 0.999 | 0       | 0       | 0.0284 | Control (1)              |
| c.3601G>A | p.Asp1201Asn | Missense | LB  | rs554487359 | FH2 | 24    | 0.023 | 0.493 | 0.0127  | 0.0034  | 0.0284 | HCM (1)                  |
| c.3624G>C | p.Gln1208His | Missense | VUS | Novel       | FH2 | 24.2  | 0.001 | 0.909 | 0       | 0       | 0.0284 | HCM (1)                  |
| c.3796A>G | p.Ile1266Val | Missense | VUS | Novel       | FH2 | 25.2  | 0.276 | 0.028 | 0       | 0       | 0.0284 | HCM (1)                  |
| c.3976G>A | p.Val1326Ile | Missense | B   | rs2303510   | FH2 | 25.6  | 0.143 | 0.145 | 33.5504 | 34.1531 | 25.454 | HCM (435); control (374) |
| c.4270T>A | p.Tyr1424Asn | Missense | VUS | rs753641918 | FH2 | 25.1  | 0.314 | 0.003 | 0.0012  | 0.0017  | 0.0568 | HCM (1); control (1)     |
| c.4519G>A | p.Ala1507Thr | Missense | LB  | rs574765321 |     | 25.9  | 0.052 | 0.946 | 0.0255  | 0.04    | 0.0852 | HCM (1); control (2)     |
| c.4586C>T | p.Pro1529Leu | Missense | VUS | Novel       |     | 18.4  | 0.342 | 0.052 | 0       | 0       | 0.0284 | Control (1)              |
| c.4667A>G | p.Asn1556Ser | Missense | LB  | rs139930679 |     | 14.11 | 0.617 | 0.002 | 0.0223  | 0.0091  | 0.1136 | HCM (2); control (2)     |
| c.4702C>T | p.Arg1568Cys | Missense | VUS | rs770836110 | DAD | 28.1  | 0.187 | 0.917 | 0.0016  | 0.0008  | 0.0284 | Control (1)              |
| c.4708G>A | p.Val1570Ile | Missense | LB  | rs201824593 | DAD | 27.2  | 0.005 | 0.991 | 0.0939  | 0.0064  | 0.0284 | HCM (1)                  |
| c.4787T>C | p.Leu1596Ser | Missense | VUS | Novel       | DAD | 24.1  | 0.0   | 0.994 | 0       | 0       | 0.0284 | Control (1)              |

#Determined according to criteria in Table S1. P, pathogenic; LP, likely pathogenic; VUS, variants of uncertain significance; LB, likely benign; B, benign.

&GnomAD: (the Genome Aggregation) <https://gnomad.broadinstitute.org/> \*ExAC: (Exome Aggregation Consortium) <http://exac.broadinstitute.org>

CADD, Combined Annotation Dependent Depletion score (phred); v1.3 (August, 2015)<sup>21</sup>; SIFT, SIFT (sorting intolerant from tolerant) algorithm; computed from ENSEMBL 55 (September, 2014)<sup>22</sup>; POLYPHEN, Polymorphism Phenotyping (v2; September 2014)<sup>23</sup>.

HCM, hypertrophic cardiomyopathy; MAF, minor allele frequency; GBD/FH3, GTPase-binding domain/formin homology 3 domain; Ex, exclusively cardiac isoform; CC, coiled-coiled; FH2, formin homology 2 domain; DAD, diaphanous auto-inhibitory domain.

**Table S3. Primer used for Sanger sequencing confirmation of *FHOD3* candidate variants.**

|             | Forward primer                | Reverse primer                |
|-------------|-------------------------------|-------------------------------|
| FHOD3-E3    | 5' ATTTTCCCAACATGGTCAAGC 3'   | 5' CAGAAGAACCTCATCTACCCC 3'   |
| FHOD3-E6    | 5' TTGGTGCCTTAATTGCATC 3'     | 5' CATTTATACTGTAACGGCTTG 3'   |
| FHOD3-E7    | 5' CGATTCAGCACATACTCGTGTT 3'  | 5' CCTCTCCCAGGTAAGCTCAT 3'    |
| FHOD3-E8    | 5' TGCCATCACTGGATACGTC 3'     | 5' TTCCAAATAAGCCCACAAGCA 3'   |
| FHOD3-E10   | 5' GGGCAATCCTGAAATGCAGTCAC 3' | 5' AAATCCACCGAGATGTTTGGC 3'   |
| FHOD3-E11   | 5' CTCTTTTCCTGGCTTTGTCT 3'    | 5' AGTTCTCTAATGAAAACATGCTC 3' |
| FHOD3-E12   | 5' ACCTCCTTGCCCTCTATAAGTCT 3' | 5' CTGTGTTCTCCTCCCCGAGT 3'    |
| FHOD3-E13   | 5' CTGTGTTCTCCTCCCCGAGT 3'    | 5' GAGTTCTGATTTGCACACC 3'     |
| FHOD3-E15P1 | 5' ATCTGAAACAAGAAGACCCGAG 3'  | 5' AGTTGTAAAGTCACATGCCTT 3'   |
| FHOD3-E15P2 | 5' CCTGGAATACTTCTATAACTCCC 3' | 5' GCCCAAGAATACATGAGTCCC 3'   |
| MYH7-E17&18 | 5' CTCACACCCTACCTCCCCACAC 3'  | 5' GAGGTCTGTGCCAGGGCGGT 3'    |
| FHOD3-E17   | 5' TGTGTGATGCTGCCATTTCCC 3'   | 5' AGTTGCTGTCTCAGTATTAGCCT 3' |
| FHOD3-E18   | 5' CCCTTCACAGCATTGCCTCGAT 3'  | 5' CCACACTCCTTGTCACCAGACA 3'  |
| FHOD3-E19P1 | 5' TGAGCCCAATGACAAGGTCCC 3'   | 5' AATCTCTCAGCCCTACCCAAC 3'   |
| FHOD3-E19P2 | 5' AGTCACTCCCATGTGTCAGGC 3'   | 5' ACTCTGTCTTCGGCTGCACC 3'    |
| FHOD3-E21   | 5' CTTGCCTAGAATGTCCTATGTGT 3' | 5' TCAATTCACCCTCCGTACCCT 3'   |
| FHOD3-E22   | 5' GTCCAGAGCCCTTGTCACC 3'     | 5' CTACAGGATGAGGGATGGGG 3'    |
| FHOD3-E28   | 5' AGCCCTCTGGATCTACTAGC 3'    | 5' CAACGTCAACAGCCAACCCT 3'    |

**Table S4. Demographic and Clinical characteristics of the subjects in the discovery study.**

| Variable               | HCM cases   | Non-HCM controls | <i>P</i> -value* |
|------------------------|-------------|------------------|------------------|
| Sample size            | 1000        | 761              |                  |
| Age at enrolment, year | 47.9 ± 14.6 | 47.7 ± 14.8      | 0.453            |
| Male, n (%)            | 645 (64.5)  | 521 (68.5)       | 0.07             |
| BMI, kg/m <sup>2</sup> | 25.5 ± 3.7  | 24.9 ± 3.4       | 0.001            |
| Echocardiography       |             |                  |                  |
| MVT, mm                | 22.6 ± 5.8  | 9.8 ± 4.2        | <0.001           |
| Left atrial, mm        | 41.7 ± 7.2  | 26.1 ± 4.2       | <0.001           |
| LVEDD, mm              | 44.0 ± 6.3  | 42.2 ± 5.2       | <0.001           |
| Ejection fraction, %   | 67.5 ± 8.2  | 65.4 ± 7.7       | 0.25             |

Continuous variables were presented as mean ± standard deviation; the categorical variable sex was presented as number (n) and percentage (%).

\*Continuous variables were compared by Student's *t*-test; the categorical variable sex was compared by chi-squared test.

HCM, hypertrophic cardiomyopathy; BMI, body mass index; MVT, maximum left ventricular wall thickness; LVEDD, left ventricular end-diastolic diameter.



**Table S5. LOD score indicating linkage between the truncating variant c.1286+2delT of *FHOD3* and hypertrophy cardiomyopathy in Pedigrees.**

| Pedigree ID        | Number of individuals genotyped | Number of carriers | LOD score 95% | LOD score 80% |
|--------------------|---------------------------------|--------------------|---------------|---------------|
| A                  | 3                               | 1                  | NA            | NA            |
| B                  | 7                               | 3                  | 1.141         | 0.966         |
| C                  | 4                               | 3                  | 0.301         | 0.301         |
| D                  | 3                               | 2                  | 0             | 0             |
| Combined LOD score |                                 |                    | 1.441         | 1.267         |

LOD, Logarithm of the odds.

LOD score 95%: Logarithms of the odds score calculated for a disease penetrance of 95%.

LOD score 80%: Logarithms of the odds score calculated for a disease penetrance of 80%.

**Table S6. Demographic and Clinical characteristics of HCM patients with *FHOD3* candidate variants.**

| Variable                         | Male        | Female      | <i>P</i> -value* |
|----------------------------------|-------------|-------------|------------------|
| Sample size                      | 24          | 9           |                  |
| Age at enrolment, year           | 45.2 ± 18.1 | 45.3 ± 15.4 | 0.981            |
| Age of diagnosis, year           | 40.5 ± 14.7 | 38.9 ± 14.9 | 0.787            |
| BMI, kg/m <sup>2</sup>           | 24.6 ± 3.0  | 24.4 ± 2.6  | 0.874            |
| Family history of SCD, n (%)     | 3 (12.5)    | 1 (11.1)    | 0.913            |
| Echocardiography                 |             |             |                  |
| MVT, mm                          | 23.9 ± 7.4  | 22.7 ± 5.5  | 0.646            |
| Left atrial, mm                  | 43.6 ± 7.0  | 41.4 ± 6.7  | 0.430            |
| LVEDD, mm                        | 46.9 ± 7.4  | 43.4 ± 6.7  | 0.217            |
| Ejection fraction, %             | 64.0 ± 12.2 | 72.3 ± 4.5  | 0.059            |
| Outflow tract obstruction, n (%) | 12 (50.0)   | 7 (77.8)    | 0.150            |

Continuous variables were presented as mean ± standard deviation; the categorical variable sex was presented as number (n) and percentage (%).

\*Continuous variables were compared by Student's *t*-test; the categorical variables were compared by chi-squared test.

HCM, hypertrophic cardiomyopathy; BMI, body mass index; MVT, maximum left ventricular wall thickness; LVEDD, left ventricular end-diastolic diameter.

**Table S7. Univariable and multivariable Cox regression analysis of the association between *FHOD3* candidate variants and SCD in patients with hypertrophy cardiomyopathy.**

| Variants              | Crude HR<br>(95% CI) | Crude<br><i>P</i> -value | Adjusted HR<br>(95% CI) | Adjusted<br><i>P</i> -value |
|-----------------------|----------------------|--------------------------|-------------------------|-----------------------------|
| <i>FHOD3</i> variants | 7.245 (2.541-17.363) | <0.001                   | 6.791 (2.268-17.353)    | 0.001                       |
| LVEDD                 | 1.033 (0.971-1.087)  | 0.295                    | 1.042 (0.975-1.107)     | 0.228                       |
| Family history of SCD | 3.133 (1.256-7.050)  | 0.016                    | 3.517 (1.382-8.167)     | 0.010                       |
| MWT                   | 1.102 (1.035-1.168)  | 0.003                    | 1.094 (1.028-1.159)     | 0.005                       |
| Left atrial diameter  | 1.037 (0.984-1.088)  | 0.167                    | 1.011 (0.954-1.068)     | 0.688                       |

SCD, sudden cardiac death; HR, hazard ratio; CI, confidence interval; MWT, maximal wall thickness;

LVEDD, left ventricular end-diastolic diameter.

**Table S8. Univariable and multivariable Cox regression analysis of the association between *FHOD3* candidate variants and all-cause death in patients with hypertrophy cardiomyopathy.**

| Variants              | Crude HR<br>(95% CI) | Crude<br><i>P</i> -value | Adjusted HR<br>(95% CI) | Adjusted<br><i>P</i> -value |
|-----------------------|----------------------|--------------------------|-------------------------|-----------------------------|
| <i>FHOD3</i> variants | 3.352 (1.224-7.459)  | 0.022                    | 3.020 (1.090-6.852)     | 0.035                       |
| LVEDD                 | 1.054 (1.014-1.090)  | 0.010                    | 1.051 (1.007-1.092)     | 0.025                       |
| Family history of SCD | 1.813 (0.842-3.519)  | 0.121                    | 1.762 (0.811-3.458)     | 0.143                       |
| MWT                   | 1.020 (0.971-1.070)  | 0.425                    | 1.026 (0.974-1.078)     | 0.318                       |
| Left atrial diameter  | 1.047 (1.010-1.083)  | 0.014                    | 1.029 (0.989-1.067)     | 0.155                       |

SCD, sudden cardiac death; HR, hazard ratio; CI, confidence interval; MWT, maximal wall thickness;

LVEDD, left ventricular end-diastolic diameter

**Figure S1. The schematic of FHOD3 protein and the distribution of candidate variants.**

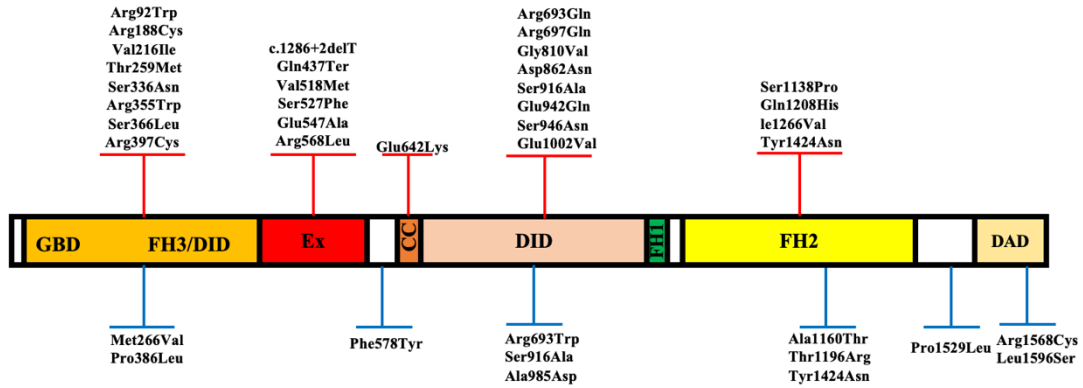

The schematic structure of FHOD3 protein is quoted from the paper by Ochoa et al<sup>15</sup>. The distribution of *FHOD3* candidate variants identified in patients with hypertrophy cardiomyopathy (up) and controls (down) were displayed. Ex, exclusively cardiac isoform; CC, coiled-coil region; DAD, diaphanous auto-regulatory domain; DID, diaphanous inhibitory domain; FH, formin homology domain; GBD, GTPase-binding domain.

Figure S2. Cumulative Kaplan–Meier analysis showing that *FHOD3* candidate variants were associated with a higher risk of outcomes than non-*FHOD3* genotype-positive patients (A-C).

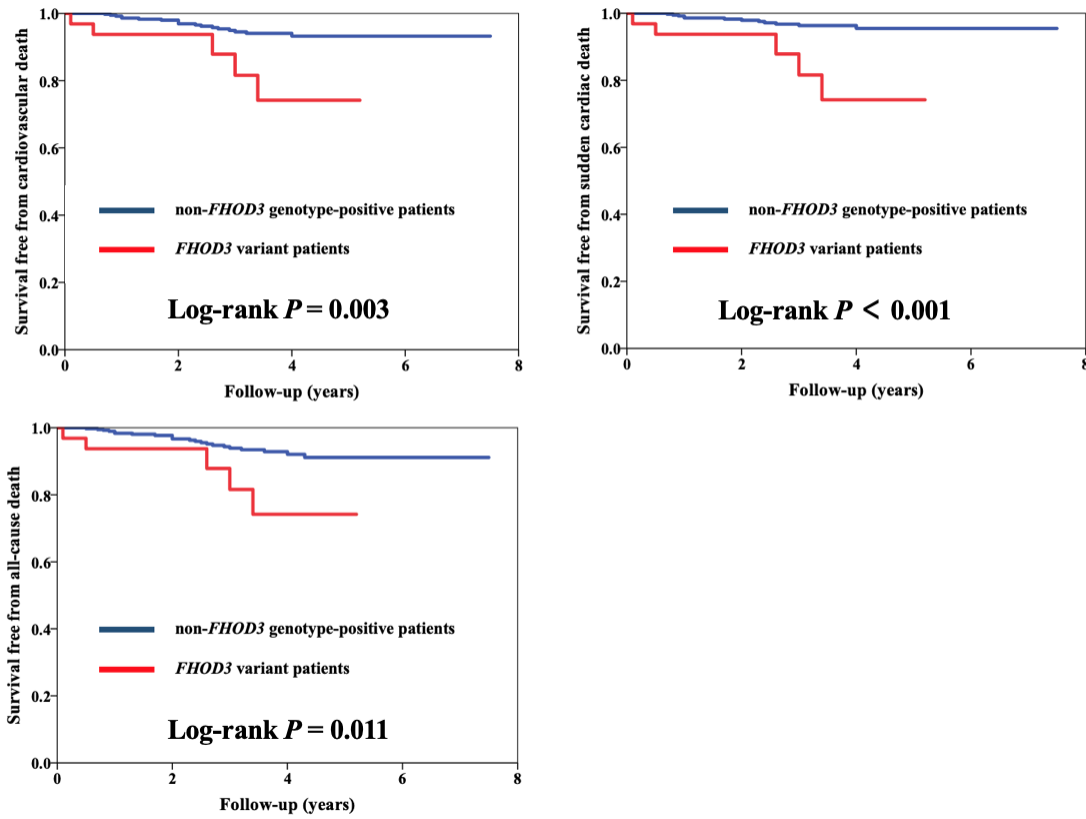

A, cardiovascular death; B; sudden cardiac death, C; all-cause death.  $P$  values were calculated using the log-rank test.
